# Supplementary material for: Synthesis, characterization and sorption studies of aromatic compounds by hydrogels of chitosan blended with β-cyclodextrin- and PVA-functionalized pectin
Source: Royal Society of Chemistry journal article supplement (doi:10.1039/c8ra02332h), 2018-01-01
Supplement: c8ra02332h1.pdf [file c8ra02332h1.pdf]

## Electronic Supplementary Information

### Synthesis, characterization and sorption studies of aromatic compounds by hydrogels of chitosan blended with $\beta$ -cyclodextrin- and PVA-functionalized pectin

Cesar M. C. Filho<sup>1</sup>, Pedro V. A. Bueno<sup>2</sup>, Alan F. Y. Matsushita<sup>1</sup>, Adley F. Rubira<sup>2</sup> Edvani C. Muniz<sup>2,3</sup>, Luísa Durães<sup>4</sup>, Dina M. B. Murtinho<sup>1</sup> and Artur J. M. Valente<sup>1,\*</sup>

<sup>1</sup>*CQC, Department of Chemistry, University of Coimbra, 3004-535 Coimbra, Portugal.*

<sup>2</sup>*Grupo de Materiais Poliméricos e Compósitos (GMPC) - Departamento de Química, Universidade Estadual de Maringá, UEM, 87020-900, Maringá, PR, Brazil.*

<sup>3</sup>*Post-graduate Program on Materials Science & Engineering, Federal University of Technology, Paraná (UTFPR-LD), 86036-370, Londrina, PR, Brazil.*

<sup>4</sup>*CIEPQPF, Department of Chemical Engineering, University of Coimbra, Rua Silvio Lima 3030-790 Coimbra, Portugal*

\*Corresponding author

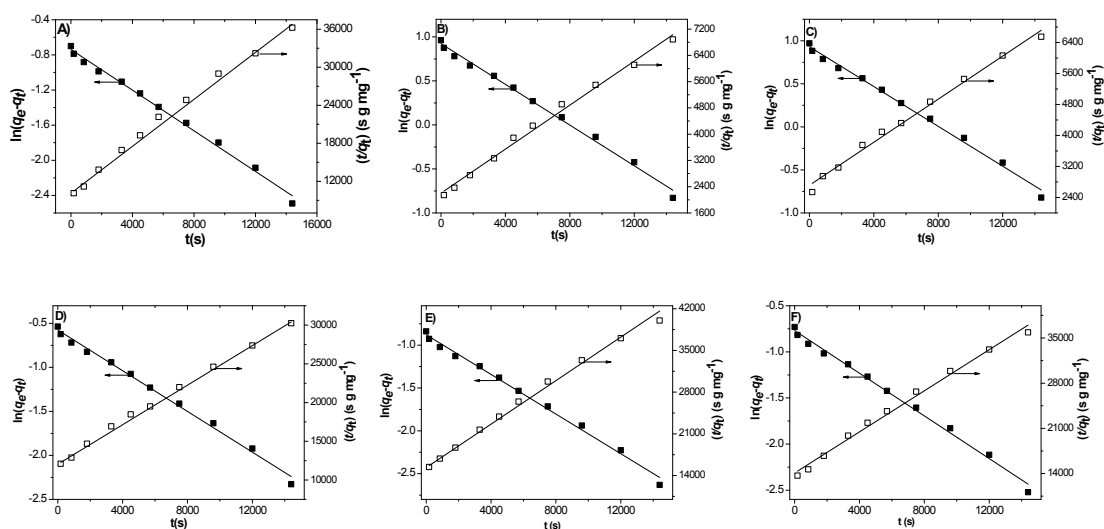

**Figure S1.** Representative plots of the fitting of linearized forms of pseudo-first (■) and pseudo-second (□) order equations to experimental sorption data for (A) Ben (B) Tol (C)Xyl (D) Pyr (E) B(b)F and (F) B(a)P onto the Pec/CS hydrogel, at 25 °C.

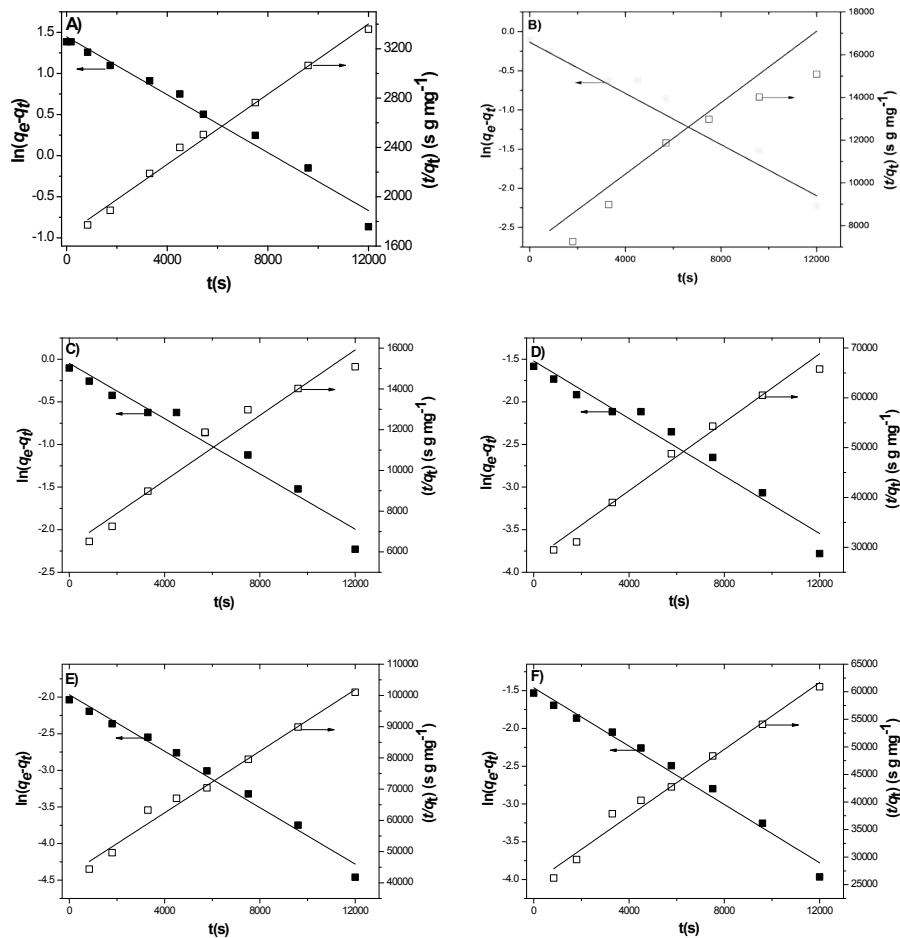

**Figure S2.** Representative plots of the fitting of linearized forms of pseudo-first (■) and pseudo-second (□) order equations to experimental sorption data for A) Ben (B) Tol (C) Xyl(D) Pyr (E) B(b)F and (F) B(a)P onto the Pec- $\beta$ -CD/CS hydrogel, at 25°C.

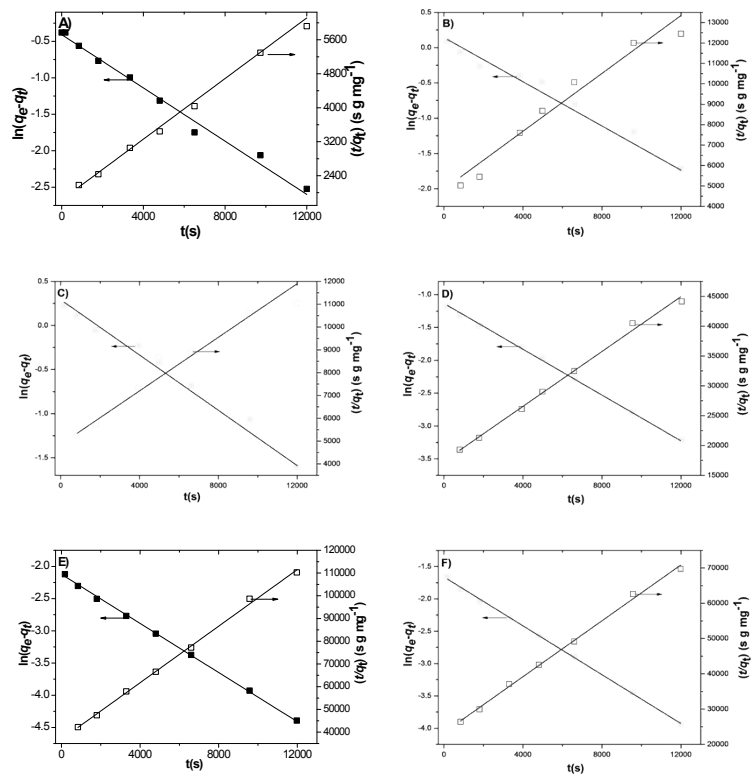

**Figure S3.** Representative plots of the fitting of linearized forms of pseudo-first (■) and pseudo-second (□) order equations to experimental sorption data for A) Ben (B) Tol (C)Xyl(D) Pyr (E) (B(b)F and (F) B(a)P onto the Pec-PVA/CS hydrogel, at 25°C.

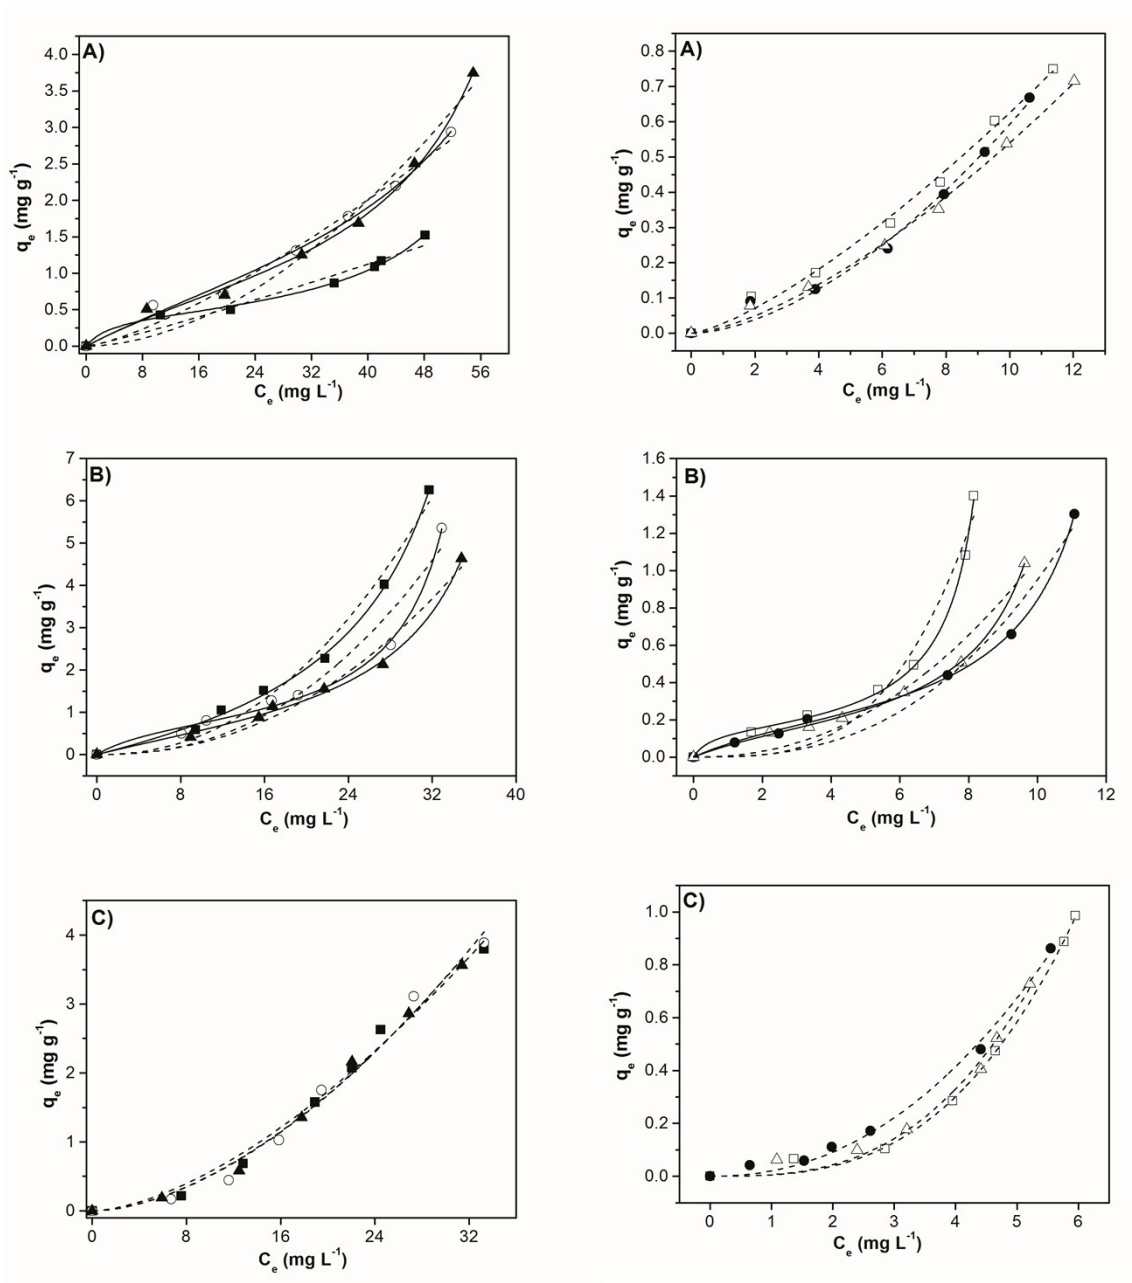

**Figure S4.** Representative sorption isotherms of benzene, toluene, xylenes, pyrene, B(b)F and B(a)P, from aqueous solutions, by the (A) Pec/CS, (B) Pec- $\beta$ -CD/CS and (C) Pec-PVA/CS hydrogels, at 25°C. Solid and dashed lines correspond to the fitting of BET and Freundlich models to the experimental data, respectively. A) to C) Ben ( $\blacksquare$ ), Tol ( $\circ$ ), Xyl ( $\blacktriangle$ ), Pyr ( $\bullet$ ), B(b)F ( $\bullet$ ) and B(a)P ( $\square$ ).

**Table S1.** Typical concentrations of BTXs and PAHs in petroleum and petroleum derivatives, and contaminated environmental media.

| Hydrocarbon | Source                                                      | concentration<br>(mg/L) | ref. |
|-------------|-------------------------------------------------------------|-------------------------|------|
| Benzene     | Soil sample, two months after an oil spill (Nigeria).       | 73.2 ( $\pm 14.0$ )     | 1    |
|             | Crude oil                                                   | 1870 ( $\pm 20$ )       | 2    |
|             | Sea water                                                   | 0.0008                  | 3,4  |
|             | Gasoline                                                    | 900 ( $\pm 100$ )       | 5    |
| Toluene     | Soil sample, two months after an oil spill (Nigeria).       | 19.2 ( $\pm 12.5$ )     | 1    |
|             | Crude oil                                                   | 6610 ( $\pm 30$ )       | 2    |
|             | Gasoline                                                    | 7500 ( $\pm 100$ )      | 5    |
| Xylenes     | Soil sample, two months after an oil spill (Nigeria).       | 21.7 ( $\pm 4.6$ )      | 1    |
|             | Crude oil                                                   | 3000                    | 2    |
|             | Gasoline                                                    | 13100 ( $\pm 400$ )     | 5    |
| Pyrene      | Crude oil                                                   | 9.2                     | 6    |
|             | Gasoline                                                    | 110 ( $\pm 10$ )        | 5    |
|             | Produced water in oil production offshore and onshore (PW)* | $6.30 \times 10^{-4}$   | 7,8  |
| B(b)F       | Crude oil                                                   | 14                      | 6    |
|             | Gasoline                                                    | 4 ( $\pm 0.3$ )         | 5    |
|             | PW                                                          | $2.80 \times 10^{-5}$   | 7,8  |
| B(a)P       | Crude oil                                                   | 7.7                     | 6    |
|             | Gasoline                                                    | 50 ( $\pm 0.2$ )        | 5    |
|             | PW                                                          | $5.20 \times 10^{-4}$   | 7,8  |

\*PW - generally consists of a mixture of formation water contained naturally in the reservoir, injected water used for the recovery of oil and treatment chemicals added during production<sup>6,7</sup>

**Table S2.** Composition of the BTXs and PHAs mixed solutions used to obtain the sorption isotherms, at 25 °C, for the indicated adsorbents.

| Pec/CS      | $C_0$ (mg L <sup>-1</sup> ) |              |            |             |             |             |
|-------------|-----------------------------|--------------|------------|-------------|-------------|-------------|
|             | Benzene                     | Toluene      | Xylenes    | Pyrene      | B(b)F       | B(a)P       |
| C1S         | 11.5(±0.2)*                 | 10.5(±0.3)   | 9.5(±0.2)  | 2.1(±0.1)   | 2.0(±0.1)   | 2.0(±0.1)   |
| C2S         | 22.5(±0.7)                  | 21.5(±0.5)   | 21.6(±0.5) | 4.3(±0.1)   | 4.2(±0.1)   | 4.0(±0.1)   |
| C3S         | 38.7(±1.0)                  | 32.9(±0.9)   | 33.7(±0.8) | 6.9(±0.2)   | 6.7(±0.2)   | 6.7(±0.2)   |
| C4S         | 44.9(±1.1)                  | 41.09(±1.03) | 42.7(±1.1) | 8.7(±0.2)   | 8.6(±0.2)   | 8.6(±0.2)   |
| C5S         | 45.2(±1.1)                  | 48.4(±1.2)   | 51.3(±1.3) | 10.5(±0.3)  | 9.7(±0.2)   | 10.8(±0.3)  |
| C6S         | 53.1(±1.3)                  | 56.9(±1.4)   | 60.5(±1.5) | 12.5(±0.3)  | 11.5(±0.3)  | 13.1(±0.8)  |
| Pec-β-CD/CS |                             |              |            |             |             |             |
| B1S         | 11.4(±0.2)                  | 9.6(±0.2)    | 10.5(±0.2) | 2.1(±0.1)   | 1.47(±0.04) | 2.7(±0.1)   |
| B2S         | 14.5(±0.3)                  | 12.5(±0.2)   | 18.4(±0.4) | 4.1(±0.1)   | 3.0(±0.1)   | 4.0(±0.1)   |
| B3S         | 19.3(±0.4)                  | 19.9(±0.4)   | 19.7(±0.4) | 6.7(±0.2)   | 4.0(±0.1)   | 5.1(±0.1)   |
| B4S         | 26.9(±0.5)                  | 23.0(±0.5)   | 25.5(±0.5) | 8.1(±0.2)   | 8.9(±0.3)   | 7.3(±0.1)   |
| B5S         | 33.3(±0.7)                  | 33.4(±0.7)   | 32.1(±0.6) | 9.9(±0.3)   | 11.2(±0.3)  | 9.3(±0.2)   |
| B6S         | 38.7(±0.8)                  | 38.9(±0.8)   | 41.0(±0.8) | 10.1(±0.3)  | 13.5(±0.4)  | 11.5(±0.2)  |
| Pec-PVA/CS  |                             |              |            |             |             |             |
| P1S         | 8.8(±0.2)                   | 7.7(±0.2)    | 7.0(±0.2)  | 1.63(±0.04) | 0.76(±0.02) | 1.25(±0.04) |
| P2S         | 15.1(±0.3)                  | 13.1(±0.3)   | 14.7(±0.4) | 3.4(±0.1)   | 1.79(±0.04) | 2.7(±0.1)   |
| P3S         | 21.5(±0.4)                  | 17.9(±0.4)   | 21.2(±0.6) | 4.8(±0.1)   | 2.3(±0.1)   | 3.7(±0.1)   |
| P4S         | 25.7(±0.5)                  | 22.1(±0.4)   | 25.9(±0.8) | 5.6(±0.1)   | 3.1(±0.1)   | 5.1(±0.2)   |
| P5S         | 28.4(±0.6)                  | 31.1(±0.6)   | 31.5(±0.9) | 7.0(±0.2)   | 5.3(±0.1)   | 5.5(±0.2)   |
| P6S         | 38.6(±0.8)                  | 38.1(±0.8)   | 37.1(±1.1) | 7.2(±0.2)   | 6.6(±0.2)   | 6.1(±0.2)   |

\*values inside brackets are standard deviations of the average

**Table S3.** Composition of mixed BTXs and PHAs solutions used to measure sorption kinetics onto the indicated hydrogels, at 25 °C.

| Pec/CS      | $C_0$ (mg L <sup>-1</sup> ) |            |            |             |             |             |
|-------------|-----------------------------|------------|------------|-------------|-------------|-------------|
|             | Benzene                     | Toluene    | Xylenes    | Pyrene      | B(b)F       | B(a)P       |
| C1K         | 11.5(±0.2)*                 | 10.5(±0.2) | 9.5(±0.2)  | 2.10(±0.04) | 2.01(±0.03) | 2.01(±0.04) |
| C2K         | 22.5(±0.4)                  | 21.5(±0.4) | 21.6(±0.4) | 4.3(±0.1)   | 4.2(±0.1)   | 4.0(±0.1)   |
| C3K         | 38.7(±0.8)                  | 32.9(±0.5) | 33.7(±0.7) | 6.9(±0.1)   | 6.7(±0.1)   | 6.7(±0.1)   |
| C4K         | 44.9(±0.9)                  | 41.1(±0.8) | 51 (±1)    | 8.6(±0.2)   | 8.6(±0.1)   | 10.8(±0.2)  |
| C5K         | 53 (±1)                     | 57 (±1)    | 60 (±1)    | 12.5(±0.3)  | 11.5(±0.2)  | 13.1(±0.3)  |
| Pec-β-CD/CS |                             |            |            |             |             |             |
| B1K         | 11.4(±0.6)                  | 9.8(±0.5)  | 10.3(±0.5) | 2.1(±0.1)   | 1.5(±0.1)   | 2.7(±0.1)   |
| B2K         | 15.9(±0.8)                  | 13.5(±0.7) | 18.8(±0.9) | 4.2(±0.2)   | 3.0(±0.2)   | 5.1(±0.3)   |
| B3K         | 27(±1)                      | 23(±1)     | 24.4(±1.3) | 7.3(±0.4)   | 4.4(±0.2)   | 7.3(±0.4)   |
| B4K         | 34 (±2)                     | 32(±2)     | 36(±2)     | 8.4(±0.4)   | 5.9(±0.3)   | 9.8(±0.5)   |
| B5K         | 39(±2)                      | 33(±2)     | 43(±2)     | 9.9(±0.5)   | 6.7(±0.3)   | 11.5(±0.6)  |
| Pec-PVA/CS  |                             |            |            |             |             |             |
| P1K         | 8.8(±0.4)                   | 7.7(±0.4)  | 7.0(±0.4)  | 1.7(±0.1)   | 0.89(±0.04) | 1.4(±0.1)   |
| P2K         | 15.1(±0.8)                  | 13.1(±0.7) | 14.4(±0.7) | 3.4(±0.2)   | 1.7(±0.1)   | 2.7(±0.1)   |
| P3K         | 21 (±1)                     | 18.9(±1)   | 21(±1)     | 4.8(±0.2)   | 2.3(±0.1)   | 3.7(±0.2)   |
| P4K         | 23 (±1)                     | 18.8(±0.9) | 22(±1)     | 6.0(±0.3)   | 3.1(±0.2)   | 4.9(±0.2)   |
| P5K         | 28 (±1)                     | 25.3(±1)   | 31(±2)     | 7.1(±0.4)   | 3.4(±0.2)   | 5.5(±0.3)   |

\*values inside brackets are standard deviations of the average

**Table S4.** Fitting kinetic parameters for the simultaneous sorption of BTXs and some PAHs onto the Pec/CS hydrogel, at 25 °C.

| Benzene |                                      |                                    |                                                                 |       |                                    |                                                                 |       |
|---------|--------------------------------------|------------------------------------|-----------------------------------------------------------------|-------|------------------------------------|-----------------------------------------------------------------|-------|
|         | $q_{e,exp}$<br>(mg g <sup>-1</sup> ) | $q_{e,1}$<br>(mg g <sup>-1</sup> ) | $k_1$ (10 <sup>-4</sup> )<br>g mg <sup>-1</sup> s <sup>-1</sup> | $AIC$ | $q_{e,2}$<br>(mg g <sup>-1</sup> ) | $k_2$ (10 <sup>-4</sup> )<br>g mg <sup>-1</sup> s <sup>-1</sup> | $AIC$ |
| C1K     | 0.42(±0.01)*                         | 0.41(±0.02)                        | 1.16(±0.02)                                                     | 3.20  | 0.46(±0.04)                        | 0.37(±0.03)                                                     | 12.95 |
| C2K     | 0.49(±0.01)                          | 0.48(±0.02)                        | 1.16(±0.02)                                                     | 3.24  | 0.54(±0.04)                        | 0.52(±0.04)                                                     | 12.89 |
| C3K     | 0.86(±0.03)                          | 0.83(±0.02)                        | 1.17(±0.02)                                                     | 3.25  | 0.93(±0.02)                        | 1.56(±0.04)                                                     | 12.41 |
| C4K     | 1.09(±0.03)                          | 1.05(±0.02)                        | 1.16(±0.02)                                                     | 3.18  | 1.17(±0.02)                        | 2.47(±0.04)                                                     | 12.21 |
| C5K     | 1.5(±0.1)                            | 1.46(±0.02)                        | 1.16(±0.02)                                                     | 3.20  | 1.64(±0.02)                        | 4.84(±0.04)                                                     | 11.92 |
| Toluene |                                      |                                    |                                                                 |       |                                    |                                                                 |       |
|         | $q_{e,exp}$<br>(mg g <sup>-1</sup> ) | $q_{e,1}$<br>(mg g <sup>-1</sup> ) | $k_1$ (10 <sup>-4</sup> )<br>g mg <sup>-1</sup> s <sup>-1</sup> | $AIC$ | $q_{e,2}$<br>(mg g <sup>-1</sup> ) | $k_2$ (10 <sup>-4</sup> )<br>g mg <sup>-1</sup> s <sup>-1</sup> | $AIC$ |
| C1K     | 0.40(±0.01)*                         | 0.39(±0.01)                        | 1.16(±0.02)                                                     | 3.25  | 0.44(±0.06)                        | 0.35(±0.03)                                                     | 13.11 |
| C2K     | 0.71(±0.02)                          | 0.69(±0.02)                        | 1.16(±0.02)                                                     | 4.79  | 0.77(±0.03)                        | 1.07(±0.02)                                                     | 13.65 |
| C3K     | 1.31(±0.04)                          | 1.26(±0.02)                        | 1.16(±0.02)                                                     | 4.39  | 1.41(±0.02)                        | 3.60(±0.03)                                                     | 13.12 |
| C4K     | 1.8(±0.1)                            | 1.71(±0.02)                        | 1.16(±0.02)                                                     | 3.25  | 1.92 (±0.04)                       | 6.63(±0.04)                                                     | 11.78 |
| C5K     | 2.9(±0.1)                            | 2.82(±0.03)                        | 1.16(±0.03)                                                     | 3.21  | 3.16(±0.02)                        | 11.81(±0.03)                                                    | 11.35 |
| Xylenes |                                      |                                    |                                                                 |       |                                    |                                                                 |       |
|         | $q_{e,exp}$<br>(mg g <sup>-1</sup> ) | $q_{e,1}$<br>(mg g <sup>-1</sup> ) | $k_1$ (10 <sup>-4</sup> )<br>g mg <sup>-1</sup> s <sup>-1</sup> | $AIC$ | $q_{e,2}$<br>(mg g <sup>-1</sup> ) | $k_2$ (10 <sup>-4</sup> )<br>g mg <sup>-1</sup> s <sup>-1</sup> | $AIC$ |
| C1K     | 0.37(±0.01)                          | 0.35(±0.02)                        | 1.16(±0.02)                                                     | 5.66  | 0.4(±0.1)                          | 0.28(±0.02)                                                     | 13.15 |
| C2K     | 0.70(±0.02)                          | 0.67(±0.02)                        | 1.16(±0.03)                                                     | 4.84  | 0.75(±0.03)                        | 1.02(±0.02)                                                     | 12.59 |
| C3K     | 1.25(±0.04)                          | 1.20(±0.02)                        | 1.16(±0.02)                                                     | 4.22  | 1.34(±0.02)                        | 3.28(±0.03)                                                     | 12.09 |
| C4K     | 2.5(±0.1)                            | 2.4(±0.02)                         | 1.16(±0.02)                                                     | 3.18  | 2.69(±0.02)                        | 13.1(±0.1)                                                      | 11.48 |
| C5K     | 3.7(±0.1)                            | 3.6(±0.02)                         | 1.17(±0.02)                                                     | 3.15  | 4.03(±0.04)                        | 29.4(±0.1)                                                      | 11.14 |
| Pyrene  |                                      |                                    |                                                                 |       |                                    |                                                                 |       |
|         | $q_{e,exp}$<br>(mg g <sup>-1</sup> ) | $q_{e,1}$<br>(mg g <sup>-1</sup> ) | $k_1$ (10 <sup>-4</sup> )<br>g mg <sup>-1</sup> s <sup>-1</sup> | $AIC$ | $q_{e,2}$<br>(mg g <sup>-1</sup> ) | $k_2$ (10 <sup>-5</sup> )<br>g mg <sup>-1</sup> s <sup>-1</sup> | $AIC$ |
| C1K     | 0.09(±0.01)                          | 0.09(±0.02)                        | 1.16(±0.02)                                                     | 3.22  | 0.09(±0.02)                        | 0.17(±0.02)                                                     | 14.37 |
| C2K     | 0.17(±0.01)                          | 0.16(±0.02)                        | 1.16(±0.02)                                                     | 3.15  | 0.2(±0.1)                          | 0.62(±0.02)                                                     | 13.81 |
| C3K     | 0.31(±0.01)                          | 0.30(±0.02)                        | 1.16(±0.02)                                                     | 3.25  | 0.3(±0.1)                          | 2.04(±0.01)                                                     | 13.29 |
| C4K     | 0.43(±0.01)                          | 0.41(±0.02)                        | 1.15(±0.01)                                                     | 3.25  | 0.46(±0.02)                        | 3.8(±0.02)                                                      | 13.02 |



|       |                                      |                                    |                                                                   |            |                                    |                                                                   |            |
|-------|--------------------------------------|------------------------------------|-------------------------------------------------------------------|------------|------------------------------------|-------------------------------------------------------------------|------------|
| C5K   | 0.75(±0.02)                          | 0.72(±0.02)                        | 1.16(±0.02)                                                       | 3.25       | 0.81(±0.01)                        | 11.8(±0.1)                                                        | 12.53      |
| B(b)F |                                      |                                    |                                                                   |            |                                    |                                                                   |            |
|       | $q_{e,exp}$<br>(mg g <sup>-1</sup> ) | $q_{e,1}$<br>(mg g <sup>-1</sup> ) | $k_1$ (10 <sup>-4</sup> )<br>g mg <sup>-1</sup> s <sup>-1</sup> ) | <i>AIC</i> | $q_{e,2}$<br>(mg g <sup>-1</sup> ) | $k_2$ (10 <sup>-5</sup> )<br>g mg <sup>-1</sup> s <sup>-1</sup> ) | <i>AIC</i> |
| C1K   | 0.06(±0.01)                          | 0.06(±0.02)                        | 1.16(±0.01)                                                       | 3.24       | 0.07(±0.02)                        | 0.09(±0.01)                                                       | 14.65      |
| C2K   | 0.12(±0.02)                          | 0.12(±0.01)                        | 1.16(±0.01)                                                       | 3.25       | 0.13(±0.02)                        | 0.33(±0.03)                                                       | 14.09      |
| C3K   | 0.24(±0.02)                          | 0.23(±0.02)                        | 1.15(±0.02)                                                       | 3.24       | 0.26(±0.03)                        | 1.2(±0.1)                                                         | 13.52      |
| C4K   | 0.39(±0.01)                          | 0.38(±0.02)                        | 1.16(±0.02)                                                       | 3.25       | 0.4(±0.1)                          | 3.3(±0.1)                                                         | 13.09      |
| C5K   | 0.67(±0.02)                          | 0.64(±0.02)                        | 1.16(±0.01)                                                       | 3.23       | 0.72(±0.03)                        | 9.33(±0.1)                                                        | 12.63      |
| B(a)P |                                      |                                    |                                                                   |            |                                    |                                                                   |            |
|       | $q_{e,exp}$<br>(mg g <sup>-1</sup> ) | $q_{e,1}$<br>(mg g <sup>-1</sup> ) | $k_1$ (10 <sup>-4</sup> )<br>g mg <sup>-1</sup> s <sup>-1</sup> ) | <i>AIC</i> | $q_{e,2}$<br>(mg g <sup>-1</sup> ) | $k_2$ (10 <sup>-5</sup> )<br>g mg <sup>-1</sup> s <sup>-1</sup> ) | <i>AIC</i> |
| C1K   | 0.07(±0.01)                          | 0.07(±0.02)                        | 1.16(±0.02)                                                       | 3.23       | 0.08(±0.01)                        | 0.10(±0.02)                                                       | 14.59      |
| C2K   | 0.13(±0.02)                          | 0.13(±0.02)                        | 1.16(±0.02)                                                       | 3.25       | 0.14(±0.02)                        | 0.36(±0.02)                                                       | 14.05      |
| C3K   | 0.24(±0.02)                          | 0.24(±0.02)                        | 1.16(±0.01)                                                       | 3.24       | 0.27(±0.01)                        | 1.30(±0.01)                                                       | 13.49      |
| C4K   | 0.54(±0.01)                          | 0.52(±0.02)                        | 1.16(±0.01)                                                       | 3.25       | 0.57(±0.04)                        | 6.05(±0.01)                                                       | 12.82      |
| C5K   | 0.72(±0.02)                          | 0.69(±0.02)                        | 1.16(±0.02)                                                       | 3.23       | 0.77(±0.03)                        | 10.7(±0.1)                                                        | 12.57      |

\*values inside brackets are standard deviations of the average

**Table S5.** Fitting kinetic parameters for the simultaneous sorption of BTXs and some PAHs onto the Pec- $\beta$ -CD/CS hydrogel, at 25 °C.

| Benzene |                                      |                                    |                                                                 |            |                                    |                                                                 |            |
|---------|--------------------------------------|------------------------------------|-----------------------------------------------------------------|------------|------------------------------------|-----------------------------------------------------------------|------------|
|         | $q_{e,exp}$<br>(mg g <sup>-1</sup> ) | $q_{e,1}$<br>(mg g <sup>-1</sup> ) | $k_1$ (10 <sup>-4</sup> )<br>g mg <sup>-1</sup> s <sup>-1</sup> | <i>AIC</i> | $q_{e,2}$<br>(mg g <sup>-1</sup> ) | $k_2$ (10 <sup>-3</sup> )<br>g mg <sup>-1</sup> s <sup>-1</sup> | <i>AIC</i> |
| B1K     | 0.58(±0.02)                          | 0.61(±0.01)                        | 1.95(±0.05)                                                     | 4.16       | 0.62(±0.04)                        | 0.09(±0.01)                                                     | 12.66      |
| B2K     | 1.08(±0.03)                          | 1.2(±0.1)                          | 1.76(±0.05)                                                     | 3.89       | 1.17(±0.02)                        | 0.26(±0.01)                                                     | 12.05      |
| B3K     | 2.3(±0.1)                            | 2.37(±0.03)                        | 1.71(±0.05)                                                     | 3.44       | 2.45(±0.01)                        | 1.20(±0.01)                                                     | 11.40      |
| B4k     | 2.8(±0.1)                            | 2.87(±0.04)                        | 1.72(±0.04)                                                     | 3.63       | 3.01(±0.01)                        | 2.08(±0.01)                                                     | 10.88      |
| B5K     | 4.02(±0.12)                          | 4.3(±0.1)                          | 1.87(±0.05)                                                     | 3.85       | 4.33(±0.01)                        | 4.01(±0.01)                                                     | 10.88      |
| Toluene |                                      |                                    |                                                                 |            |                                    |                                                                 |            |
|         | $q_{e,exp}$<br>(mg g <sup>-1</sup> ) | $q_{e,1}$<br>(mg g <sup>-1</sup> ) | $k_1$ (10 <sup>-4</sup> )<br>g mg <sup>-1</sup> s <sup>-1</sup> | <i>AIC</i> | $q_{e,2}$<br>(mg g <sup>-1</sup> ) | $k_2$ (10 <sup>-3</sup> )<br>g mg <sup>-1</sup> s <sup>-1</sup> | <i>AIC</i> |
| B1K     | 0.49(±0.01)                          | 0.5(±0.1)                          | 1.95(±0.01)                                                     | 4.18       | 0.54(±0.04)                        | 0.06(±0.04)                                                     | 12.74      |
| B2K     | 0.83(±0.02)                          | 0.9(±0.1)                          | 1.63(±0.01)                                                     | 4.10       | 0.90(±0.02)                        | 0.15(±0.04)                                                     | 12.25      |
| B3K     | 1.7(±0.1)                            | 1.9(±0.1)                          | 2.28(±0.01)                                                     | 3.99       | 1.80(±0.02)                        | 0.91(±0.04)                                                     | 11.87      |
| B4K     | 2.4(±0.1)                            | 2.1(±0.1)                          | 1.93(±0.02)                                                     | 4.59       | 2.45(±0.01)                        | 1.42(±0.04)                                                     | 10.69      |
| B5K     | 2.6(±0.1)                            | 2.8(±0.1)                          | 1.54(±0.01)                                                     | 4.21       | 2.81(±0.01)                        | 2.45(±0.04)                                                     | 11.51      |
| Xylenes |                                      |                                    |                                                                 |            |                                    |                                                                 |            |
|         | $q_{e,exp}$<br>(mg g <sup>-1</sup> ) | $q_{e,1}$<br>(mg g <sup>-1</sup> ) | $k_1$ (10 <sup>-4</sup> )<br>g mg <sup>-1</sup> s <sup>-1</sup> | <i>AIC</i> | $q_{e,2}$<br>(mg g <sup>-1</sup> ) | $k_2$ (10 <sup>-3</sup> )<br>g mg <sup>-1</sup> s <sup>-1</sup> | <i>AIC</i> |
| B1K     | 0.41(±0.01)                          | 0.4(±0.1)                          | 1.59(±0.01)                                                     | 4.05       | 0.44(±0.04)                        | 0.05(±0.04)                                                     | 12.58      |
| B2K     | 0.90(±0.03)                          | 0.95(±0.04)                        | 1.62(±0.01)                                                     | 4.08       | 0.98(±0.02)                        | 0.18(±0.04)                                                     | 12.19      |
| B3K     | 1.7(±0.1)                            | 1.9(±0.1)                          | 2.07(±0.02)                                                     | 4.27       | 1.86(±0.02)                        | 0.84(±0.04)                                                     | 12.02      |
| B4K     | 3.3(±0.1)                            | 3.4(±0.1)                          | 1.6(±0.1)                                                       | 3.57       | 3.59(±0.01)                        | 2.53(±0.04)                                                     | 10.73      |
| B5K     | 3.8(±0.1)                            | 3.93(±0.03)                        | 1.74(±0.04)                                                     | 4.18       | 4.09(±0.01)                        | 3.78(±0.04)                                                     | 11.20      |
| Pyrene  |                                      |                                    |                                                                 |            |                                    |                                                                 |            |
|         | $q_{e,exp}$<br>(mg g <sup>-1</sup> ) | $q_{e,1}$<br>(mg g <sup>-1</sup> ) | $k_1$ (10 <sup>-4</sup> )<br>g mg <sup>-1</sup> s <sup>-1</sup> | <i>AIC</i> | $q_{e,2}$<br>(mg g <sup>-1</sup> ) | $k_2$ (10 <sup>-4</sup> )<br>g mg <sup>-1</sup> s <sup>-1</sup> | <i>AIC</i> |
| B1K     | 0.13(±0.01)                          | 0.14(±0.04)                        | 1.7(±0.1)                                                       | 3.87       | 0.14(±0.01)                        | 0.04(±0.01)                                                     | 14.03      |
| B2K     | 0.21(±0.01)                          | 0.22(±0.01)                        | 1.68(±0.01)                                                     | 4.20       | 0.22(±0.01)                        | 0.09(±0.04)                                                     | 13.50      |
| B3K     | 0.49(±0.01)                          | 0.53(±0.05)                        | 1.80(±0.01)                                                     | 4.04       | 0.53(±0.04)                        | 0.55(±0.04)                                                     | 12.78      |
| B4K     | 0.88(±0.02)                          | 0.94(±0.06)                        | 1.71(±0.01)                                                     | 4.19       | 0.96(±0.03)                        | 1.69(±0.04)                                                     | 12.54      |

|       |                                      |                                    |                                                                   |            |                                    |                                                                   |            |
|-------|--------------------------------------|------------------------------------|-------------------------------------------------------------------|------------|------------------------------------|-------------------------------------------------------------------|------------|
| B5K   | 2.08(±0.03)                          | 2.12(±0.05)                        | 1.8(±0.1)                                                         | 3.99       | 2.13(±0.01)                        | 9.13(±0.04)                                                       | 12.03      |
| B(b)F |                                      |                                    |                                                                   |            |                                    |                                                                   |            |
|       | $q_{e,exp}$<br>(mg g <sup>-1</sup> ) | $q_{e,1}$<br>(mg g <sup>-1</sup> ) | $k_1$ (10 <sup>-4</sup> )<br>g mg <sup>-1</sup> s <sup>-1</sup> ) | <i>AIC</i> | $q_{e,2}$<br>(mg g <sup>-1</sup> ) | $k_2$ (10 <sup>-5</sup> )<br>g mg <sup>-1</sup> s <sup>-1</sup> ) | <i>AIC</i> |
| B1K   | 0.08(±0.02)                          | 0.08(±0.04)                        | 1.79(±0.04)                                                       | 3.72       | 0.08(±0.01)                        | 0.16(±0.01)                                                       | 14.19      |
| B2K   | 0.13(±0.01)                          | 0.14(±0.04)                        | 1.92(±0.04)                                                       | 3.89       | 0.14(±0.01)                        | 0.46(±0.01)                                                       | 13.76      |
| B3K   | 0.32(±0.01)                          | 0.33(±0.04)                        | 1.91(±0.04)                                                       | 3.94       | 0.34(±0.04)                        | 2.71(±0.04)                                                       | 12.94      |
| B4K   | 0.59(±0.01)                          | 0.63(±0.04)                        | 1.93(±0.03)                                                       | 3.83       | 0.63(±0.01)                        | 9.54(±0.01)                                                       | 12.43      |
| B5K   | 0.65(±0.02)                          | 0.69(±0.01)                        | 1.91(±0.01)                                                       | 3.89       | 0.69(±0.02)                        | 11.6(±0.01)                                                       | 12.31      |
| B(a)P |                                      |                                    |                                                                   |            |                                    |                                                                   |            |
|       | $q_{e,exp}$<br>(mg g <sup>-1</sup> ) | $q_{e,1}$<br>(mg g <sup>-1</sup> ) | $k_1$ (10 <sup>-4</sup> )<br>g mg <sup>-1</sup> s <sup>-1</sup> ) | <i>AIC</i> | $q_{e,2}$<br>(mg g <sup>-1</sup> ) | $k_2$ (10 <sup>-4</sup> )<br>g mg <sup>-1</sup> s <sup>-1</sup> ) | <i>AIC</i> |
| B1K   | 0.13(±0.01)                          | 0.13(±0.04)                        | 1.73(±0.01)                                                       | 4.02       | 0.14(±0.01)                        | 0.06(±0.04)                                                       | 13.89      |
| B2K   | 0.22(±0.01)                          | 0.23(±0.04)                        | 1.92(±0.01)                                                       | 3.89       | 0.23(±0.01)                        | 0.13(±0.01)                                                       | 13.34      |
| B3K   | 0.50(±0.02)                          | 0.53(±0.04)                        | 1.91(±0.01)                                                       | 3.87       | 0.53(±0.03)                        | 0.71(±0.04)                                                       | 12.53      |
| B4K   | 0.91(±0.03)                          | 0.96(±0.04)                        | 1.93(±0.01)                                                       | 3.75       | 0.97(±0.02)                        | 2.33(±0.04)                                                       | 12.05      |
| B5K   | 1.04(±0.03)                          | 1.10(±0.04)                        | 1.9(±0.1)                                                         | 3.82       | 1.11(±0.02)                        | 2.98(±0.01)                                                       | 11.94      |

\*values inside brackets are standard deviations of the average

**Table S6.** Fitting kinetic parameters for the simultaneous sorption of BTXs and some PAHs onto the Pec-PVA/CShydrogel, at 25 °C.

| Benzene |                                      |                                    |                                                                 |            |                                    |                                                                 |            |
|---------|--------------------------------------|------------------------------------|-----------------------------------------------------------------|------------|------------------------------------|-----------------------------------------------------------------|------------|
|         | $q_{e,exp}$<br>(mg g <sup>-1</sup> ) | $q_{e,1}$<br>(mg g <sup>-1</sup> ) | $k_1$ (10 <sup>-4</sup> )<br>g mg <sup>-1</sup> s <sup>-1</sup> | <i>AIC</i> | $q_{e,2}$<br>(mg g <sup>-1</sup> ) | $k_2$ (10 <sup>-4</sup> )<br>g mg <sup>-1</sup> s <sup>-1</sup> | <i>AIC</i> |
| P1K     | 0.21(±0.01)                          | 0.22(±0.02)                        | 1.68(±0.05)                                                     | 3.46       | 0.22(±0.02)                        | 0.02 (±0.01)                                                    | 13.23      |
| P2K     | 0.68(±0.02)                          | 0.7(±0.1)                          | 1.68(±0.05)                                                     | 3.73       | 0.69 (±0.01)                       | 0.15(±0.01)                                                     | 9.54       |
| P3K     | 1.07(±0.03)                          | 1.04(±0.08)                        | 1.38(±0.05)                                                     | 4.10       | 1.09(±0.02)                        | 0.26(±0.01)                                                     | 12.10      |
| P4K     | 1.7(±0.1)                            | 1.8(±0.1)                          | 1.56(±0.04)                                                     | 4.27       | 1.74(±0.02)                        | 0.56(±0.01)                                                     | 12.11      |
| P5K     | 2.6(±0.1)                            | 2.6(±0.1)                          | 1.62(±0.05)                                                     | 3.96       | 2.67(±0.02)                        | 1.97(±0.02)                                                     | 12.19      |
| Toluene |                                      |                                    |                                                                 |            |                                    |                                                                 |            |
|         | $q_{e,exp}$<br>(mg g <sup>-1</sup> ) | $q_{e,1}$<br>(mg g <sup>-1</sup> ) | $k_1$ (10 <sup>-4</sup> )<br>g mg <sup>-1</sup> s <sup>-1</sup> | <i>AIC</i> | $q_{e,2}$<br>(mg g <sup>-1</sup> ) | $k_2$ (10 <sup>-4</sup> )<br>g mg <sup>-1</sup> s <sup>-1</sup> | <i>AIC</i> |
| P1K     | 0.17(±0.01)                          | 0.2(±0.1)                          | 1.59(±0.01)                                                     | 4.24       | 0.17(±0.02)                        | 0.92(±0.01)                                                     | 13.19      |
| P2K     | 0.44(±0.01)                          | 0.4(±0.1)                          | 1.94(±0.02)                                                     | 3.99       | 0.45(±0.01)                        | 0.85(±0.02)                                                     | 12.80      |
| P3K     | 1.10(±0.03)                          | 1.2(±0.1)                          | 1.56(±0.01)                                                     | 4.20       | 1.13(±0.02)                        | 2.61(±0.02)                                                     | 12.31      |
| P4K     | 1.29(±0.04)                          | 1.4(±0.1)                          | 1.41(±0.01)                                                     | 4.12       | 1.32(±0.02)                        | 2.73(±0.02)                                                     | 12.39      |
| P5K     | 2.4(±0.1)                            | 2.7(±0.1)                          | 1.39(±0.01)                                                     | 4.22       | 2.52(±0.02)                        | 7.82(±0.02)                                                     | 12.32      |
| Xylenes |                                      |                                    |                                                                 |            |                                    |                                                                 |            |
|         | $q_{e,exp}$<br>(mg g <sup>-1</sup> ) | $q_{e,1}$<br>(mg g <sup>-1</sup> ) | $k_1$ (10 <sup>-4</sup> )<br>g mg <sup>-1</sup> s <sup>-1</sup> | <i>AIC</i> | $q_{e,2}$<br>(mg g <sup>-1</sup> ) | $k_2$ (10 <sup>-4</sup> )<br>g mg <sup>-1</sup> s <sup>-1</sup> | <i>AIC</i> |
| P1K     | 0.19(±0.01)                          | 0.21(±0.04)                        | 1.61(±0.02)                                                     | 3.81       | 0.2(±0.1)                          | 0.06(±0.01)                                                     | 14.13      |
| P2K     | 0.58(±0.02)                          | 0.6(±0.1)                          | 2.2(±0.1)                                                       | 4.48       | 0.59(±0.01)                        | 1.59(±0.02)                                                     | 12.50      |
| P3K     | 1.25(±0.04)                          | 1.3(±0.1)                          | 1.6(±0.1)                                                       | 4.16       | 1.27(±0.02)                        | 3.3(±0.1)                                                       | 12.20      |
| P4K     | 1.54(±0.04)                          | 1.6(±0.1)                          | 1.39(±0.01)                                                     | 4.25       | 1.58(±0.01)                        | 4.6 (±0.1)                                                      | 12.11      |
| P5K     | 2.9(±0.1)                            | 2.5(±0.1)                          | 1.73(±0.02)                                                     | 3.81       | 2.89(±0.03)                        | 5.1(±0.1)                                                       | 10.83      |
| Pyrene  |                                      |                                    |                                                                 |            |                                    |                                                                 |            |
|         | $q_{e,exp}$<br>(mg g <sup>-1</sup> ) | $q_{e,1}$<br>(mg g <sup>-1</sup> ) | $k_1$ (10 <sup>-4</sup> )<br>g mg <sup>-1</sup> s <sup>-1</sup> | <i>AIC</i> | $q_{e,2}$<br>(mg g <sup>-1</sup> ) | $k_2$ (10 <sup>-4</sup> )<br>g mg <sup>-1</sup> s <sup>-1</sup> | <i>AIC</i> |
| P1K     | 0.07(±0.01)                          | 0.07(±0.04)                        | 1.7(±0.1)                                                       | 3.93       | 0.07(±0.01)                        | 0.01(±0.01)                                                     | 14.72      |
| P2K     | 0.16(±0.01)                          | 0.17(±0.04)                        | 1.8(±0.1)                                                       | 3.80       | 0.17(±0.03)                        | 0.07(±0.01)                                                     | 13.60      |
| P3K     | 0.30(±0.01)                          | 0.31(±0.03)                        | 1.7(±0.1)                                                       | 3.70       | 0.31(±0.01)                        | 0.25(±0.01)                                                     | 13.07      |
| P4K     | 0.47(±0.01)                          | 0.48(±0.04)                        | 1.7(±0.1)                                                       | 3.78       | 0.48(±0.01)                        | 0.62(±0.01)                                                     | 12.64      |

|       |                                      |                                    |                                                                 |            |                                    |                                                                 |            |
|-------|--------------------------------------|------------------------------------|-----------------------------------------------------------------|------------|------------------------------------|-----------------------------------------------------------------|------------|
| P5K   | 0.89(±0.02)                          | 0.91(±0.04)                        | 1.7(±0.1)                                                       | 3.73       | 0.90(±0.01)                        | 2.02(±0.01)                                                     | 12.24      |
| B(b)F |                                      |                                    |                                                                 |            |                                    |                                                                 |            |
|       | $q_{e,exp}$<br>(mg g <sup>-1</sup> ) | $q_{e,1}$<br>(mg g <sup>-1</sup> ) | $k_1$ (10 <sup>-4</sup> )<br>g mg <sup>-1</sup> s <sup>-1</sup> | <i>AIC</i> | $q_{e,2}$<br>(mg g <sup>-1</sup> ) | $k_2$ (10 <sup>-5</sup> )<br>g mg <sup>-1</sup> s <sup>-1</sup> | <i>AIC</i> |
| P1K   | 0.04(±0.01)                          | 0.04(±0.01)                        | 1.6(±0.1)                                                       | 3.88       | 0.04(±0.01)                        | 0.04(±0.01)                                                     | 15.16      |
| P2K   | 0.06(±0.01)                          | 0.06(±0.03)                        | 1.9(±0.1)                                                       | 3.70       | 0.06(±0.04)                        | 0.12(±0.01)                                                     | 14.31      |
| P3K   | 0.11(±0.01)                          | 0.12(±0.03)                        | 1.9(±0.1)                                                       | 3.65       | 0.12(±0.03)                        | 0.47(±0.01)                                                     | 13.78      |
| P4K   | 0.17(±0.01)                          | 0.17(±0.04)                        | 1.9(±0.1)                                                       | 3.75       | 0.17(±0.02)                        | 1.1(±0.1)                                                       | 13.19      |
| P5K   | 0.33(±0.01)                          | 0.33(±0.04)                        | 1.9(±0.1)                                                       | 3.64       | 0.34(±0.01)                        | 3.59(±0.01)                                                     | 12.84      |
| B(a)P |                                      |                                    |                                                                 |            |                                    |                                                                 |            |
|       | $q_{e,exp}$<br>(mg g <sup>-1</sup> ) | $q_{e,1}$<br>(mg g <sup>-1</sup> ) | $k_1$ (10 <sup>-4</sup> )<br>g mg <sup>-1</sup> s <sup>-1</sup> | <i>AIC</i> | $q_{e,2}$<br>(mg g <sup>-1</sup> ) | $k_2$ (10 <sup>-5</sup> )<br>g mg <sup>-1</sup> s <sup>-1</sup> | <i>AIC</i> |
| P1K   | 0.06(±0.01)                          | 0.07(±0.04)                        | 1.7(±0.1)                                                       | 3.87       | 0.06(±0.04)                        | 0.08(±0.01)                                                     | 14.83      |
| P2K   | 0.09(±0.02)                          | 0.10(±0.04)                        | 1.9(±0.1)                                                       | 3.73       | 0.10(±0.04)                        | 0.3(±0.1)                                                       | 13.87      |
| P3K   | 0.19(±0.01)                          | 0.19(±0.04)                        | 1.9(±0.1)                                                       | 3.70       | 0.19(±0.02)                        | 1.17(±0.04)                                                     | 13.37      |
| P4K   | 0.26(±0.01)                          | 0.26(±0.04)                        | 1.9(±0.1)                                                       | 3.81       | 0.27(±0.01)                        | 2.47(±0.04)                                                     | 12.83      |
| P5K   | 0.52(±0.02)                          | 0.52(±0.03)                        | 1.9(±0.1)                                                       | 3.66       | 0.53(±0.01)                        | 9.12(±0.04)                                                     | 12.42      |

\*values inside brackets are standard deviations of the average

## References

- 1 I. Osuji and O. Achugasim, *J. Appl. Sci. Environ. Manag.*, 2010, **14**, 17–20.
- 2 P. L. Grizzle and H. J. Coleman, *Anal. Chem.*, 1979, **51**, 602–608.
- 3 IPCS/WHO, *Benzene. Environmental Health Criteria 150*, . International Programme on Chemical Safety, World Health Organization., Geneva, Switzerland, 1993.
- 4 G. Pezzagno, L. Maestri and M. L. Fiorentino, *Am. J. Ind. Med.*, 1999, **35**, 511–518.
- 5 C. M. C. Filho, T. Matias, L. Durães and A. J. M. Valente, *Colloids Surfaces A Physicochem. Eng. Asp.*, 2017, **520**, 550–560.
- 6 D. M. Pampanin and M. O. Sydnes, in *Hydrocarbon*, eds. V. . Kutcherov and A. Kolesnikov, InTech, 2013, p. 216.
- 7 O. G. P. P. W. Fate and E. T. Force, *Fate and Effects of Naturally Occurring Substances in Produced Water on the Marine Environment*, Technical Report, 2005.
- 8 T. I. Røe Utvik, *Chemosphere*, 1999, **39**, 2593–2606.
